# Supplementary material for: Exploring noninvasive matrices for assessing long-term exposure to phthalates: a scoping review
Source: Frontiers journal article supplement (doi:10.3389/fpubh.2024.1411588), 2024-08-02
Supplement: Table_1.DOCX [file Table_1.DOCX]

**Exploring Noninvasive Matrices for Assessing Long-term Exposure to Phthalates: A Scoping Review**

Li-wen Chen 1,#, Xin Chen 1,#, Hua-yan Mo 1, Chun-han Shan 1, Ruo-ping Zhu2,*, Hui Gao 1,*, Fang-biao Tao 3

1 Department of Pediatrics, the First Affiliated Hospital of Anhui Medical University, No.218 *Jixi* Road, Hefei 230022, Anhui, China

2 Child Healthcare Department, Anhui Hospital Affiliated to Children’s Hospital of Fudan University/Anhui Provincial Children’s Hospital, Hefei, 230022, Anhui Province, P.R. China

3 Key Laboratory of Population Health Across Life Cycle (Anhui Medical University)，Ministry of Education of the People’s Republic of China, No 81 Meishan Road, Hefei, 230032, Anhui, China

# Li-wen Chen and Xin Chen contributed equally to this manuscript.

* Corresponding author: Ruo-ping Zhu, Child Healthcare Department, Anhui Hospital Affiliated to Children’s Hospital of Fudan University/Anhui Provincial Children’s Hospital, Hefei230022，Anhui Province, P.R. China, Tel:+8618156999761; e-mail: [zrp0922@126.com;](mailto:zrp0922@126.com;) Hui Gao, Department of Pediatrics, the First Affiliated Hospital of Anhui Medical University, No.218 *Jixi* Road, Hefei 230022, Anhui, China, E-mail: [gh20190130@163.com](mailto:taofangbiao@126.com), Tel: 0086-055162922415.

**Table S1. PECOS criteria used in the present review**

| **Parameter** | **Description** |
| --- | --- |
| **Population** | Inclusion: human |
| Exclusion: animals, soil, air, water or other non-human participants |
| **Exposure** | Inclusion: all phthalates or phthalate metabolites exposure |
| Exclusion: not phthalate or its metabolite exposure |
| **Comparison** | Inclusion: concentrations of phthalates or their phthalate metabolites in blood or urine |
| Exclusion: other controls |
| **Outcome** | Inclusion: concentrations of phthalates or their phthalate metabolites in nail or hair |
| Exclusion: no concentrations of phthalates and their metabolites in nails or hair |
| **Study design** | Inclusion: all observational studies, including cohort study, case–control study, cross-sectional survey, matched pair design |
| Exclusion: review, systematic review, meta-analysis, comment, meeting report, letter, etc. |
